# Supplementary material for: Seawater operating bio-photovoltaic cells coupling semiconductor photoanodes and enzymatic biocathodes
Source: Royal Society of Chemistry journal article supplement (doi:10.1039/c7se00051k), 2017-01-01
Supplement: c7se00051k1.pdf [file c7se00051k1.pdf]

## Electronic Supporting Information

### Seawater Operating Bio-Photovoltaic Cells Coupling Semiconductor Photoanodes and Enzymatic Biocathodes

Lingling Zhang<sup>a</sup>, Isabel Álvarez-Martos<sup>a</sup>, Alexander Vakurov<sup>a</sup>, Elena E. Ferapontova<sup>a\*</sup>

*Interdisciplinary Nanoscience Center (iNANO), Science and Technology, Aarhus University, Gustav Wieds Vej 1590-14, DK-8000 Aarhus C, Denmark*

Corresponding Author: Tel: +45-87156703; E-mail: elena.ferapontova@inano.au.dk

#### Figures

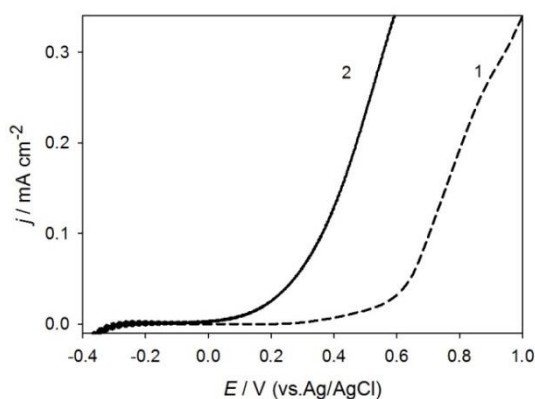

**Figure S1.** Representative linear sweep voltammograms of photoelectrocatalytic oxidation of water at (1) pristine hematite and (2) Zn-doped hematite in 1 M NaOH under the light illumination (AM 1.5G, 100 mW cm<sup>-2</sup>). Potential scan rate: 5 mV s<sup>-1</sup>.

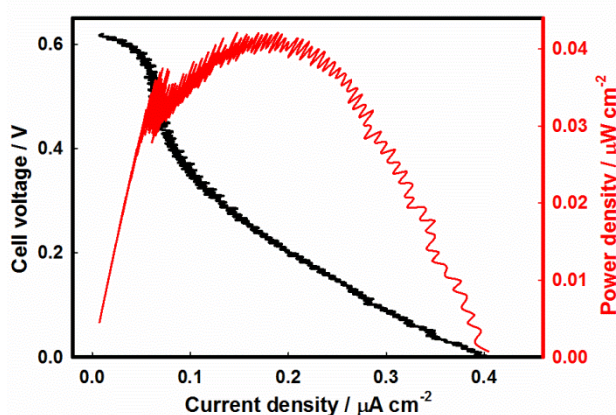

**Figure S2.** Representative dependencies of the cell voltage and cell power density on the cell current density recorded for the BPV cell comprising Zn-doped hematite and the BOD/GCC biocathode in 1M Tris-HCl, pH 8, dark cell conditions. Maximum power density is 42 nW cm<sup>-2</sup>.

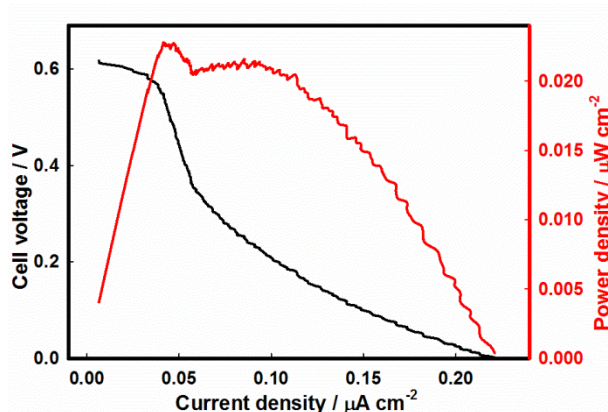

**Figure S3.** Representative dependencies of the cell voltage and cell power density on the cell current density recorded for the BPV cell comprising Zn-doped hematite and the BOD/GCC biocathode in seawater, dark cell conditions. Maximum power density is  $21 \text{ nW cm}^{-2}$ .

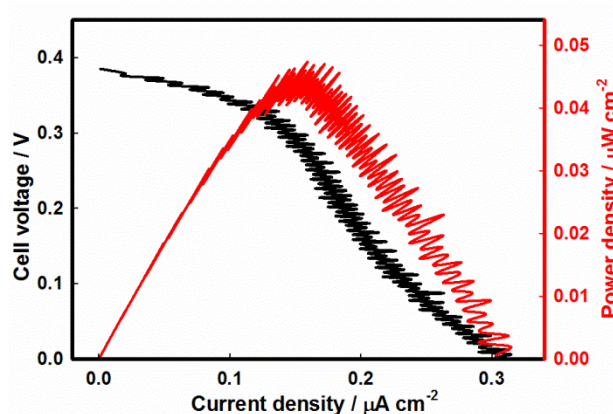

**Figure S4.** Representative dependencies of the cell voltage and cell power density on the cell current density recorded for the PV cell comprising the Zn-doped hematite photoanode and the Pt mesh cathode in 1 M Tris-HCl, pH 8, dark cell conditions. Maximum power density is  $44 \text{ nW cm}^{-2}$ .

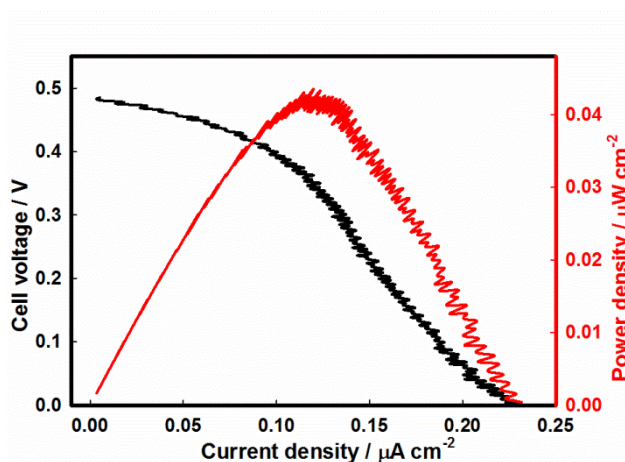

**Figure S5.** Representative dependencies of the cell voltage and cell power density on the cell current density recorded for the PV cell comprising the Zn-doped hematite photoanode and the Pt mesh cathode in seawater, dark cell conditions. Maximum power density is  $42 \text{ nW cm}^{-2}$ .
